# Supplementary material
Source: HighWire-hosted journal article supplement (https://svn.bmj.com/content/5/1/65)
Supplement: inline-supplementary-material-1 [file inline-supplementary-material-1.pdf]

Supplementary table. Current guidelines for treatment of symptomatic and asymptomatic carotid stenosis

| Guidelines        | Symptomatic status | OMT                                                                                                 | CEA                                                                                                                                                                                                                                                                              | CAS                                                                                                                                                                                                                                                                                                                                                                                                                                                                                                                               |
|-------------------|--------------------|-----------------------------------------------------------------------------------------------------|----------------------------------------------------------------------------------------------------------------------------------------------------------------------------------------------------------------------------------------------------------------------------------|-----------------------------------------------------------------------------------------------------------------------------------------------------------------------------------------------------------------------------------------------------------------------------------------------------------------------------------------------------------------------------------------------------------------------------------------------------------------------------------------------------------------------------------|
| ESC Guideline     | symptomatic        | Stenosis <50%                                                                                       | 70–99% carotid stenosis (Class I, level A),<br>50–69% carotid stenosis (Class IIa, level A),<br>with documented procedural death/stroke rate < 6%;<br>Preferably performed within 14 days of symptom onset (Class I, level A)                                                    | High-risk anatomical features or medical comorbidities for CEA, with documented procedural death/stroke rate < 6% (Class IIa, level B);<br>Alternative to CEA in average surgical risk patients, with documented procedural death/ stroke rate < 6% (Class IIb, level B);<br>Preferably performed within 14 days of symptom onset (Class I, level A)                                                                                                                                                                              |
|                   | asymptomatic       | Stenosis < 60%;<br>Occlusion or near-occlusion;<br>Unfavorable anatomy or life expectancy ≤ 5 years | Average surgical risk patients with 60-99% stenosis and characteristics (clinical and/or imaging) associated with an increased risk of stroke, provided documented perioperative stroke/death rates are <3% and the patient's life expectancy is > 5 years (Class IIa, level B); | High risk for CEA patients with 60-99% stenosis and characteristics associated with an increased risk of stroke, provided documented perioperative stroke/death rates are <3% and the patient's life expectancy is > 5 years (Class IIa, level B);<br>Alternative to CEA in average surgical risk patients with 60-99% stenosis and characteristics associated with an increased risk of stroke, provided documented perioperative stroke/death rates are <3% and the patient's life expectancy is > 5 years (Class IIb, level B) |
| AHA/ASA guideline | symptomatic        | Stenosis <50%:<br>antiplatelet therapy, statin therapy, and risk factor modification is             | 70%–99% carotid stenosis, with perioperative morbidity and mortality risk estimated to be <6% (Class I, level A);                                                                                                                                                                | Alternative to CEA for average- or low-risk surgical patients with >70% stenosis by noninvasive imaging or >50% by catheter-based imaging or noninvasive imaging with corroboration and the anticipated rate                                                                                                                                                                                                                                                                                                                      |

|  |              |                                                                                                                                                                                                                                                                                           |                                                                                                                                                                                                                                                                                                                                                                                                                                                                                                                                                                                                              |                                                                                                                                                                                                                                                                                                                                                                                                                                                                                                                                                                                                                                                                                 |
|--|--------------|-------------------------------------------------------------------------------------------------------------------------------------------------------------------------------------------------------------------------------------------------------------------------------------------|--------------------------------------------------------------------------------------------------------------------------------------------------------------------------------------------------------------------------------------------------------------------------------------------------------------------------------------------------------------------------------------------------------------------------------------------------------------------------------------------------------------------------------------------------------------------------------------------------------------|---------------------------------------------------------------------------------------------------------------------------------------------------------------------------------------------------------------------------------------------------------------------------------------------------------------------------------------------------------------------------------------------------------------------------------------------------------------------------------------------------------------------------------------------------------------------------------------------------------------------------------------------------------------------------------|
|  |              | recommended for all patients with carotid artery stenosis and a TIA or stroke (Class I, level A).                                                                                                                                                                                         | <p>50%–69% carotid stenosis, in combination of patient-specific factors (e.g. age, sex, and comorbidities), with perioperative morbidity and mortality risk estimated to be &lt;6% (Class I; Level B);</p> <p>Performed within 2 weeks of neurological event if no contraindications to early revascularization (Class IIa, level B);</p> <p>Preferred in patients &gt; 70 years old; CAS is equivalent to CEA in younger patients (Class IIa, level B);</p> <p>Performed by operators with established periprocedural stroke and mortality rates of &lt;6% for symptomatic patients (Class I, level B);</p> | <p>of periprocedural stroke or death is &lt;6% (Class IIa, level B);</p> <p>CAS in equivalent to CEA in younger patients (Class IIa, level B);</p> <p>&gt;70% carotid stenosis with anatomic or medical conditions associated with increased risk for surgery or presence of other specific circumstances (such as radiation-induced stenosis or restenosis after CEA) (Class IIa, level B);</p> <p>Performed by operators with established periprocedural stroke and mortality rates of &lt;6% for symptomatic patients (Class I, level B);</p> <p>Performed within 2 weeks of neurological event if no contraindications to early revascularization (Class IIa, level B);</p> |
|  | asymptomatic | <p>Daily aspirin, statin, appropriate medical therapies and lifestyle changes for all patients (Class I, level C);</p> <p>Aspirin perioperatively unless contraindicated (Class I, level C);</p> <p>Effectiveness of CEA/CAS and OMT alone not well established (Class IIb, level B).</p> | <p>Considered in patients with &gt;70% stenosis if risk of perioperative stroke, MI and death &lt;3%.</p> <p>Effectiveness compared with OMT alone not established (Class A, level A);</p>                                                                                                                                                                                                                                                                                                                                                                                                                   | <p>Highly selected patients with carotid stenosis (minimum, 60% by angiography, 70% by validated Doppler ultrasound). Effectiveness compared with OMT alone not well established (Class IIb, level B);</p>                                                                                                                                                                                                                                                                                                                                                                                                                                                                      |

|                                                                                              |              |                                                                                                                                                                                                                                                                   |                                                                                                                                                                                                                                                                                                                                                                                                                                       |                                                                                                                                                                                                                                                                                                                                                                                                                                                                                                       |
|----------------------------------------------------------------------------------------------|--------------|-------------------------------------------------------------------------------------------------------------------------------------------------------------------------------------------------------------------------------------------------------------------|---------------------------------------------------------------------------------------------------------------------------------------------------------------------------------------------------------------------------------------------------------------------------------------------------------------------------------------------------------------------------------------------------------------------------------------|-------------------------------------------------------------------------------------------------------------------------------------------------------------------------------------------------------------------------------------------------------------------------------------------------------------------------------------------------------------------------------------------------------------------------------------------------------------------------------------------------------|
| ASA/ACCF/AHA/<br>AANN/AANS/<br>ACR/ASNR/CNS/<br>SAIP/SCAI/SIR/<br>SNIS/SVM/<br>SVS guideline | symptomatic  | Patients at high risk of complications for CEA or CAS because of comorbidities;<br>Effectiveness of revascularization versus OMT alone not well established (Class IIb, level B);<br>Stenosis <50%;<br>Chronic total occlusion;<br>Severe disability from stroke. | >70% carotid stenosis and average or low surgical risk (Class I, level A) or<br>> 50% as documented by catheter angiography (Class I, level B) with estimated rate of perioperative stroke or mortality less than 6%;<br>When revascularization is indicated in older patients, particularly when arterial patho-anatomy is unfavorable for CAS (Class IIa, level B);<br>Performed within 2 weeks is preferable (Class IIa, level B). | Alternative to CEA in patients with >70% stenosis as documented by noninvasive imaging or >50% stenosis as documented by catheter angiography with average or low risk of complications associated with CAS, with anticipated rate of periprocedural stroke or mortality less than 6% (Class I, level B);<br>When revascularization is indicated in patients with neck anatomy unfavorable for arterial surgery (Class IIa, level B);<br>Performed within 2 weeks is preferable (Class IIa, level B). |
|                                                                                              | asymptomatic | Patients at high risk of complications for CEA or CAS because of comorbidities;<br>Effectiveness of revascularization versus OMT alone not well established (Class IIb, level B);<br>Stenosis <50%;<br>Chronic total occlusion;<br>Severe disability from stroke. | More than 70% stenosis, and risk of perioperative stroke, MI, and death is low (Class IIa, level A);                                                                                                                                                                                                                                                                                                                                  | Considered in highly selected patients with stenosis (minimum 60% by angiography, 70% by validated Doppler ultrasound).<br>Effectiveness compared with OMT alone not well established (Class IIb, level B);                                                                                                                                                                                                                                                                                           |
